# Supplementary material
Source: Springer Nature journal article supplement (https://www.springermedizin.de/resource/supplementary/12889_2006_1021_MOESM13_ESM.pdf/9503152)
Supplement: MOESM13 [file 9503152]

**Week 49**

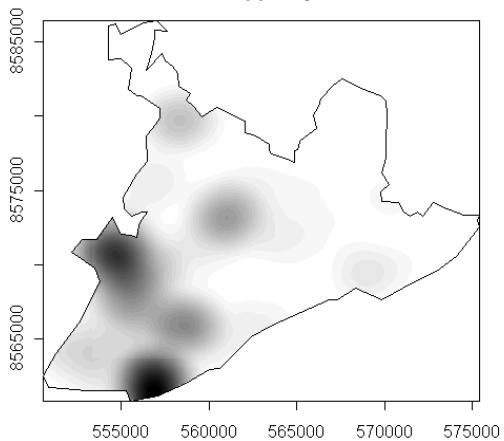

numbers of cases: 209

**Week 50**

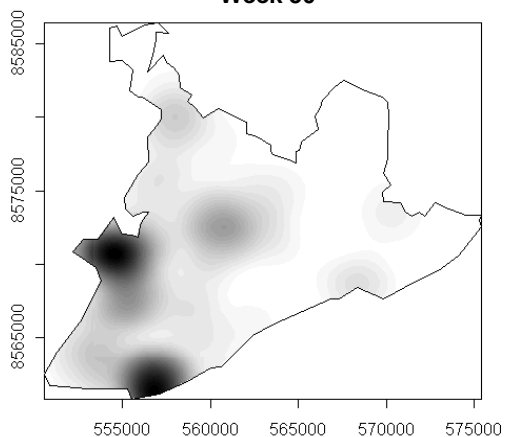

numbers of cases: 264

**Week 51**

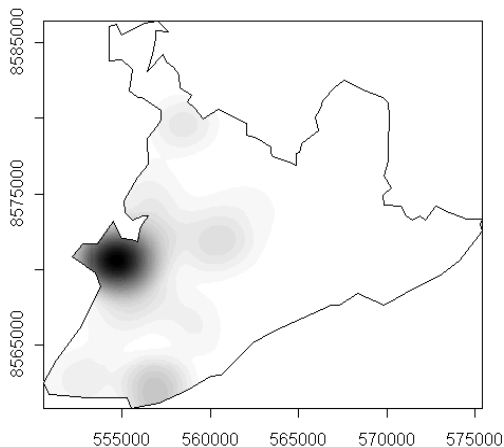

numbers of cases: 345

**Week 52**

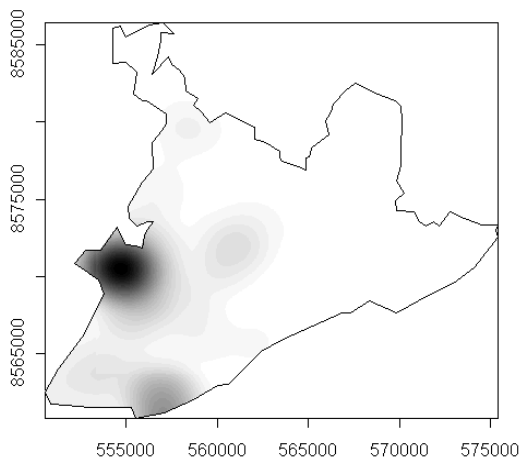

numbers of cases: 477

**Week 53**

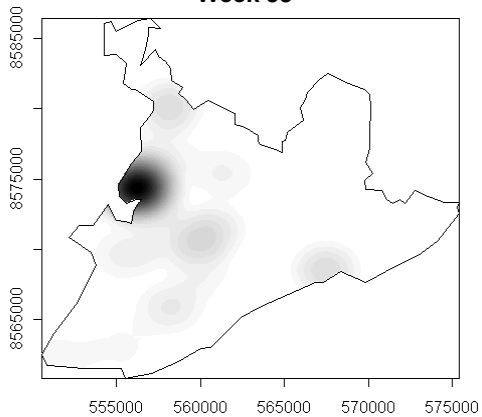

numbers of cases: 58
